# Supplementary material for: In situ preparation of multi-wall carbon nanotubes/Au composites for oxygen electroreduction
Source: Royal Society of Chemistry journal article supplement (doi:10.1039/c6ra16533h), 2016-01-01
Supplement: c6ra16533h1.pdf [file c6ra16533h1.pdf]

*Electronic Supplementary Information*

***In-situ Preparation of Multi-wall Carbon Nanotubes/Au Composites for Oxygen Electoreduction***

Na Li,<sup>a,b</sup> Zhenghua Tang,<sup>a,c,\*</sup> Likai Wang,<sup>a</sup> Qiannan Wang,<sup>a</sup> Wei Yan,<sup>a</sup> Hongyu Yang,<sup>a</sup> Shaowei Chen,<sup>a,d</sup> and Changhong Wang<sup>b,\*</sup>

<sup>a</sup> *New Energy Research Institute, School of Environment and Energy, South China University of Technology, Guangzhou Higher Education Mega Centre, Guangzhou, 510006, China.*

*Email: zhht@scut.edu.cn*

<sup>b</sup> *School of Materials and Energy, Guangdong University of Technology, Guangzhou, 510006, P. R. China.*

*Email: wangchh@gdut.edu.cn*

<sup>c</sup> *Guangdong Provincial Key Laboratory of Atmospheric Environment and Pollution Control, Guangdong Provincial Engineering and Technology Research Center for Environmental Risk Prevention and Emergency Disposal, School of Environment and Energy, South China University of Technology, Guangzhou Higher Education Mega Centre, Guangzhou, 510006, China*

<sup>d</sup> *Department of Chemistry and Biochemistry, University of California, 1156 High Street, Santa Cruz, California 95064, United States.*

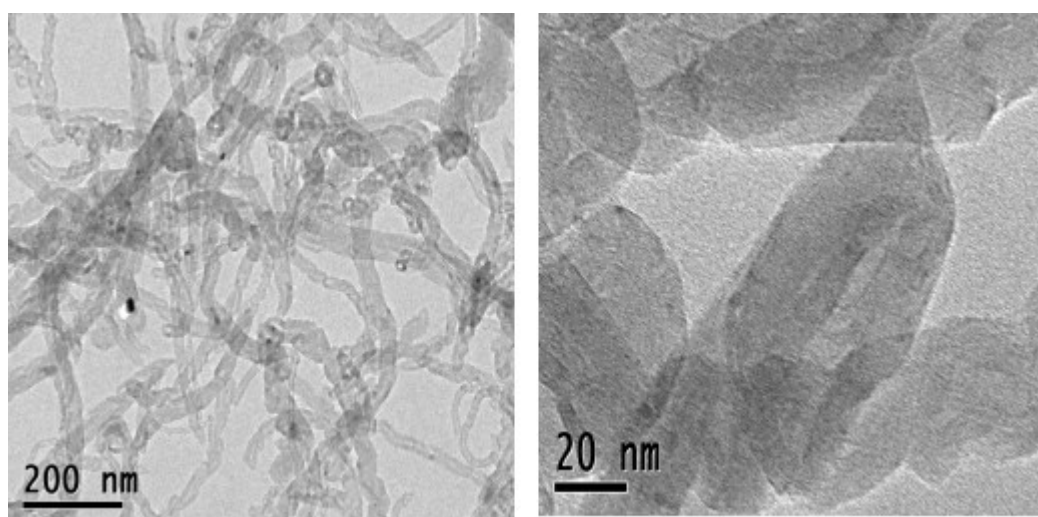

**Figure S1.** Representative TEM images of the multi-wall carbon nanotubes (CNTs).

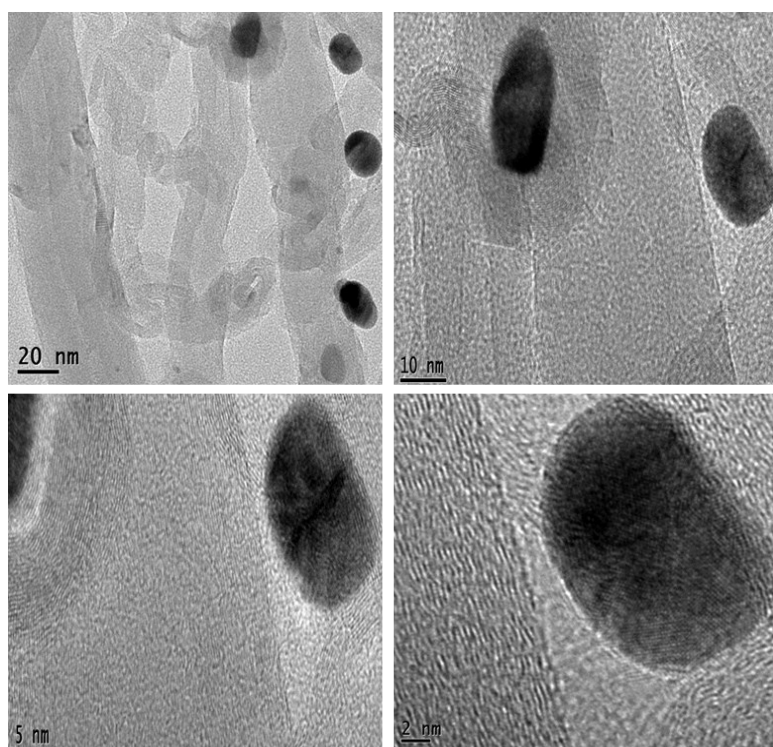

**Figure S2.** Representative HR-TEM images of the Au/CNTs= 1: 2 composite with different magnitudes.

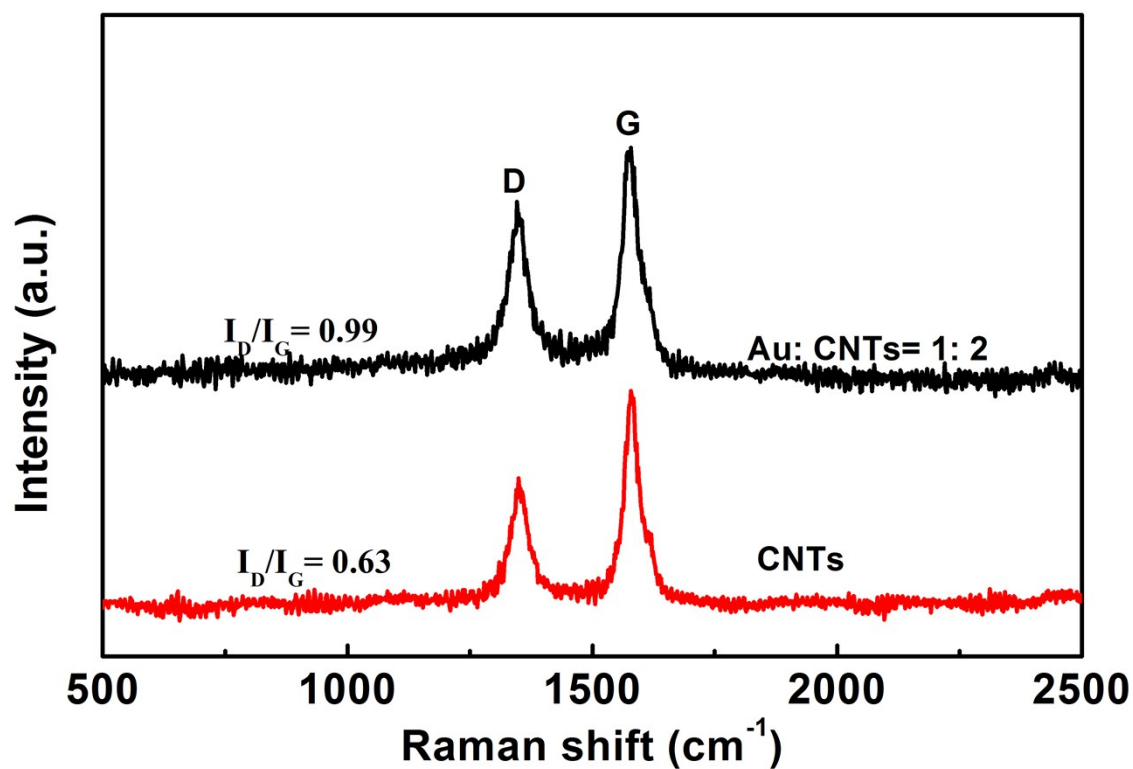

**Figure S3.** Raman spectra of Au/CNTs= 1: 2 and CNTs alone.

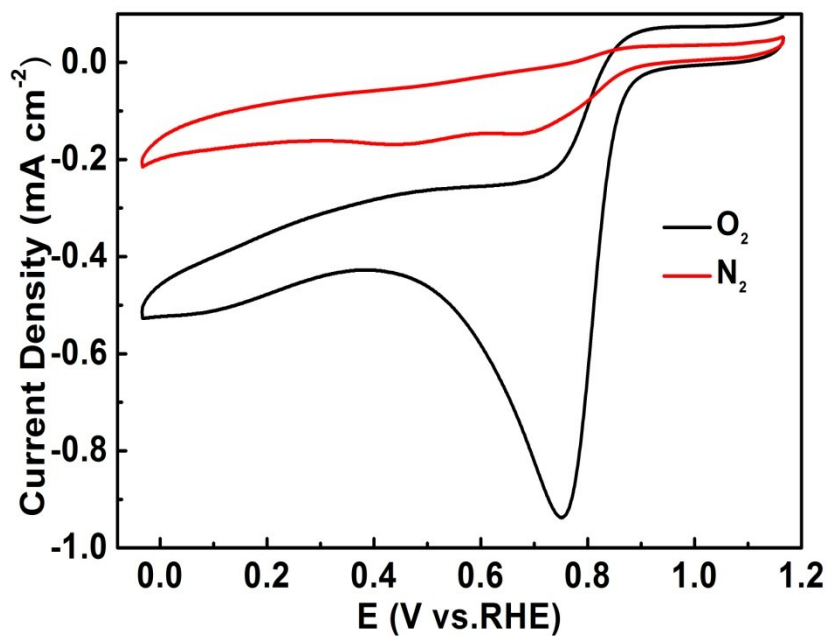

**Figure S4.** CV voltammograms of nanocomposite Au/CNTs (1: 2) in  $\text{O}_2$ -saturated and  $\text{N}_2$ -saturated 0.1 M KOH solution representatively.

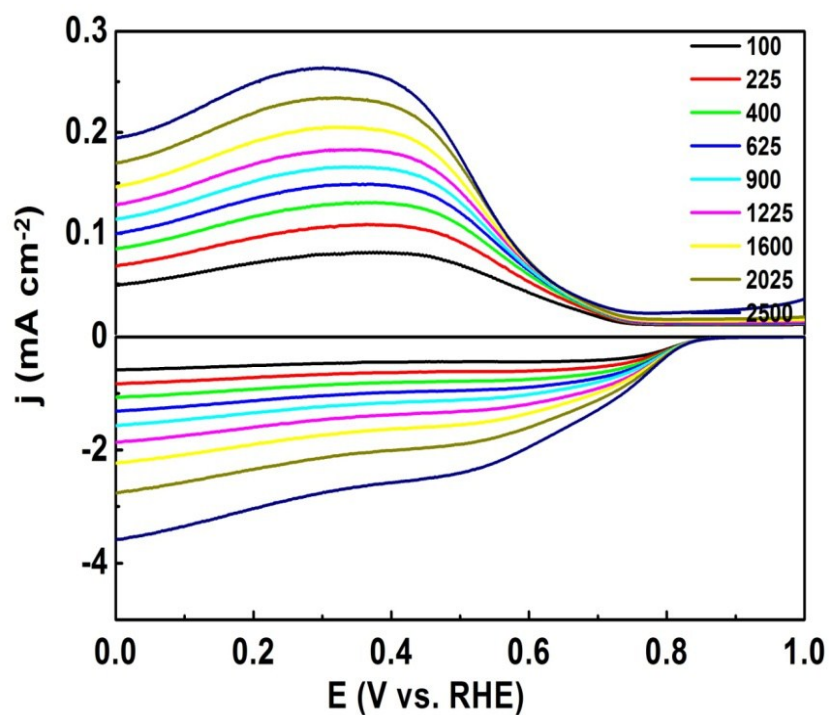

**Figure S5.** LSV curves for nanocomposite of Au/CNTs (1: 2) with different rotation rates.

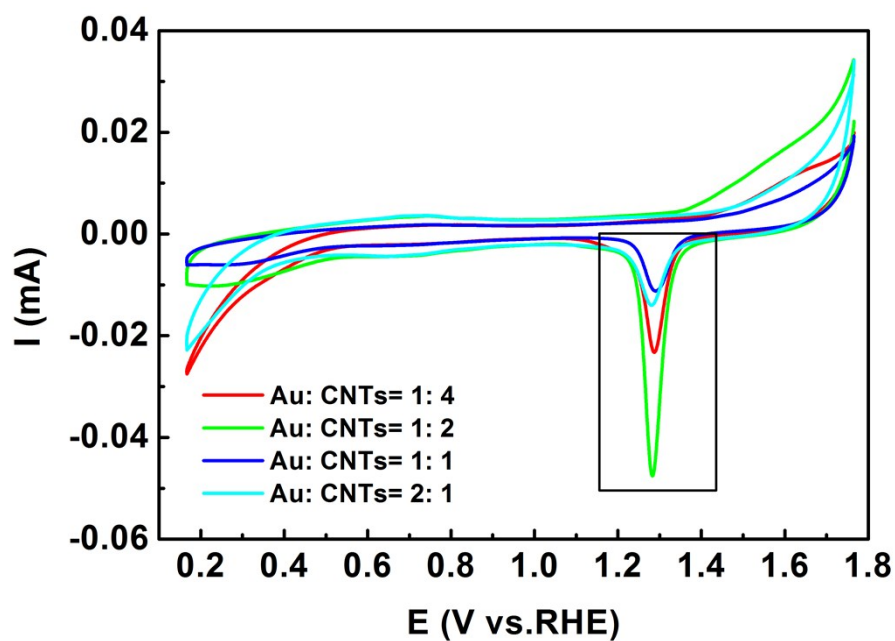

**Figure S6.** Cyclic voltammograms of Au/CNTs nanocomposites in  $N_2$ -saturated 0.1 M  $HClO_4$  solution at 25 °C (scan rate, 10 mV/s).

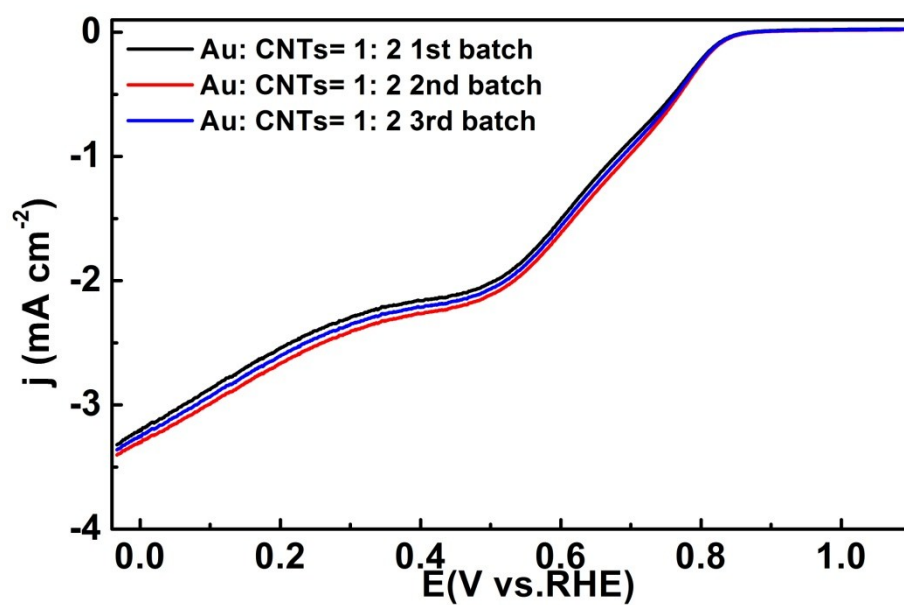

**Figure S7.** The LSV measurements of Au/CNTs = 1: 2 from different batches.
